# Supplementary material for: Facile Synthesis with TiO2 Xerogel and Urea Enhanced Aniline Aerofloat Degradation Performance of Direct Z-Scheme Heterojunction TiO2/g-C3N4 Composite
Source: MDPI journal article supplement (doi:10.3390/ma15103613), 2022-05-18
Supplement: s1 [file s1]

# Supporting Information

## Facile synthesis with TiO<sub>2</sub> xerogel and enhanced Aniline Aerofloat degradation performance of direct Z-scheme heterojunction TiO<sub>2</sub>/g-C<sub>3</sub>N<sub>4</sub> composite

Sipin Zhu<sup>1,2</sup>, Zhiyong Chen<sup>3</sup>, Chunying Wang<sup>1,2</sup>, Jiahao Pan<sup>1,2</sup>, Xianping Luo<sup>1,2,\*</sup>

<sup>1</sup> Faculty of Resource and Environmental Engineering, Jiangxi University of Science and Technology, Ganzhou 341000, China

<sup>2</sup> Jiangxi Key Laboratory of Mining & Metallurgy Environmental Pollution Control, Ganzhou

<sup>3</sup> Ganfeng Lithium Co. Ltd., Ganzhou 341000, China

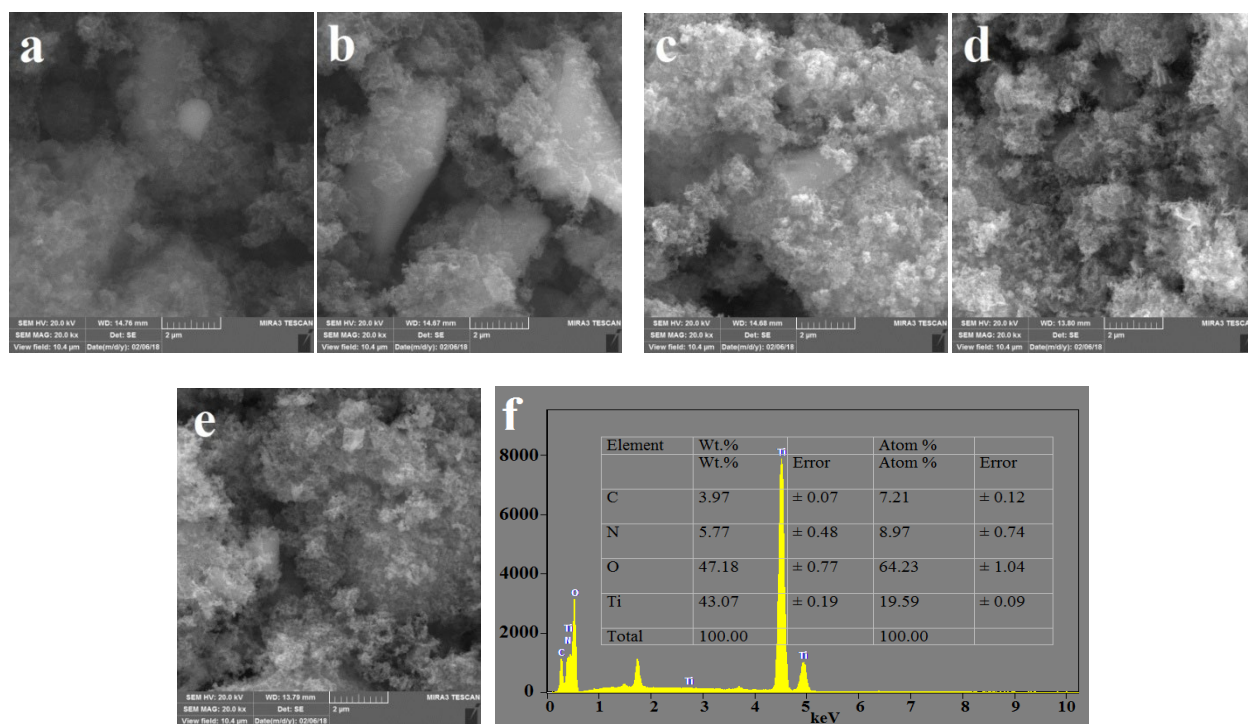

**Figure S1.** SEM images at 20,000 times of TCN-T<sub>y</sub>: (a) T<sub>450</sub>; (b) T<sub>500</sub>; (c) T<sub>550</sub>; (d) T<sub>600</sub>; (e) T<sub>650</sub> and (f) EDS spectrum of

TCN-U<sub>20</sub>.

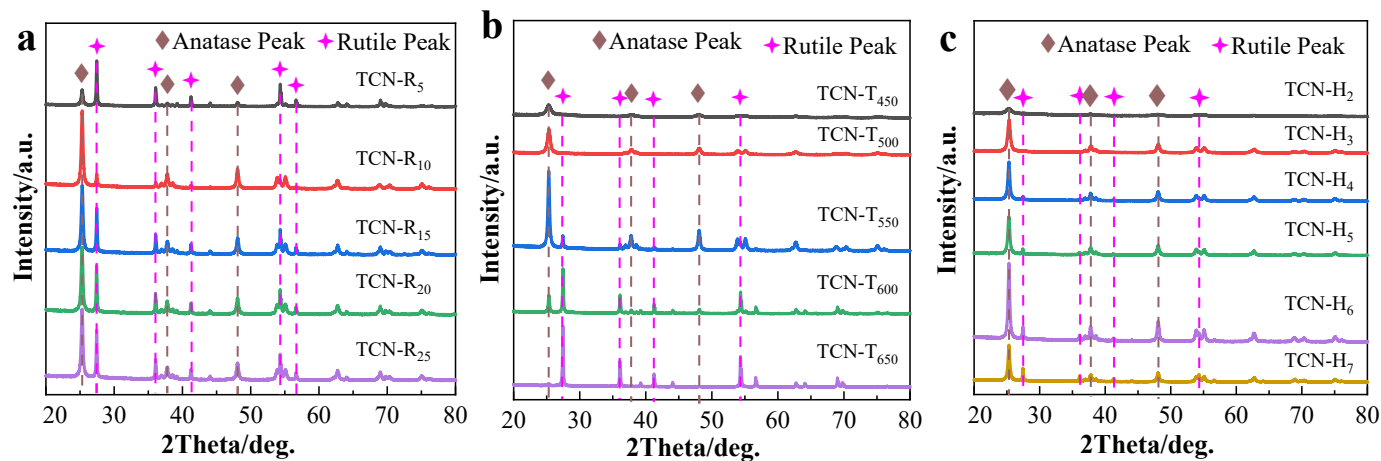

**Figure S2.** XRD patterns of TCN: (a) TCN-R<sub>z</sub>, (b) TCN-T<sub>y</sub>, and (c) TCN-H<sub>n</sub>.

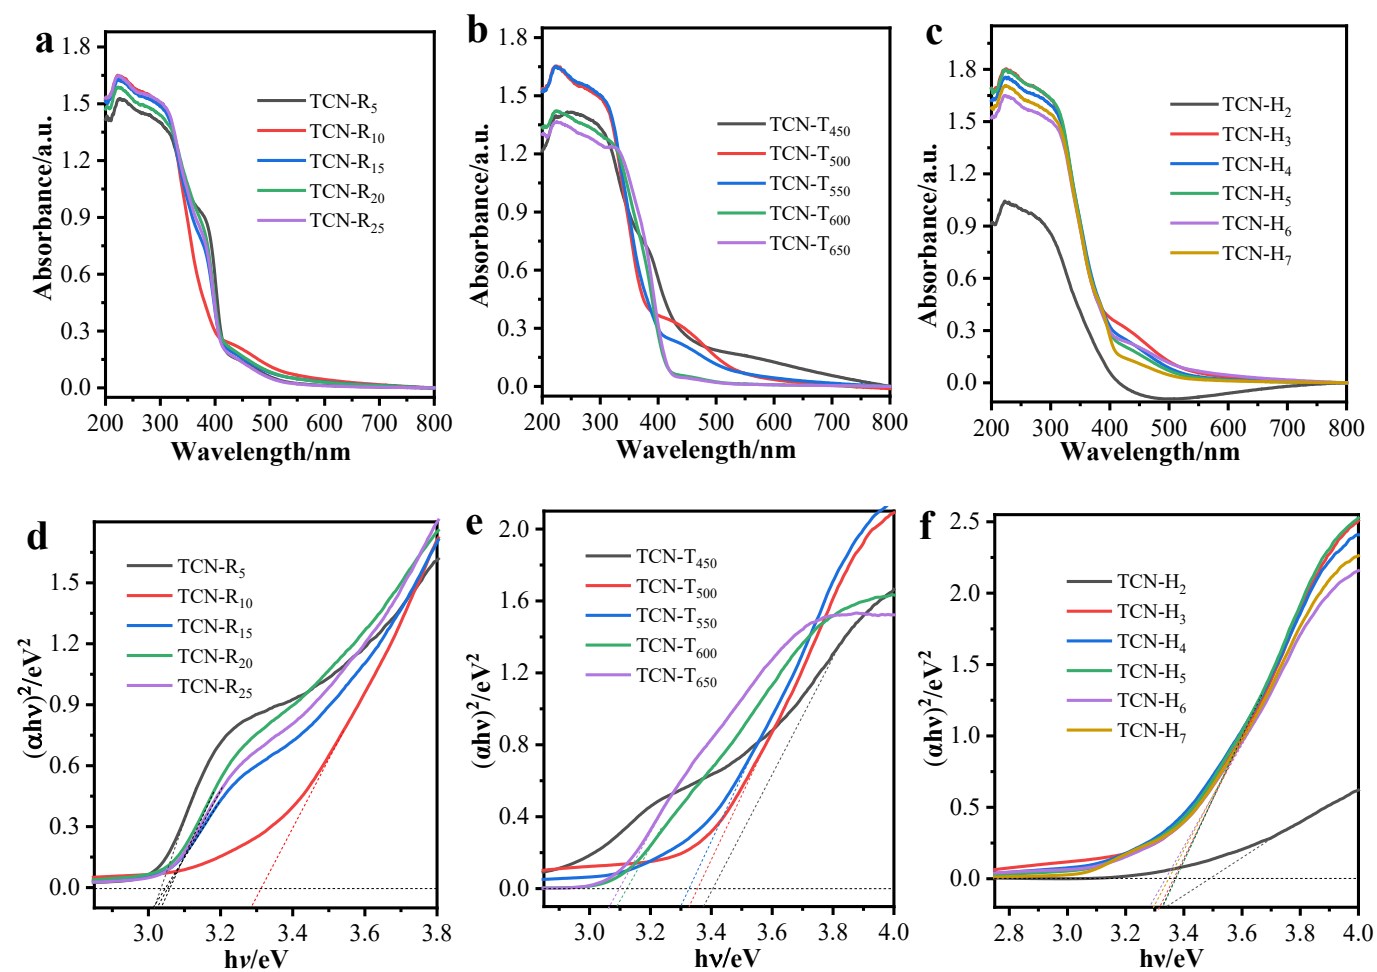

**Figure S3.** UV-Vis DRS spectra of (a, d) TCN-R<sub>z</sub>, (b, e) TCN-T<sub>y</sub>, and (c, f) TCN-H<sub>n</sub>.

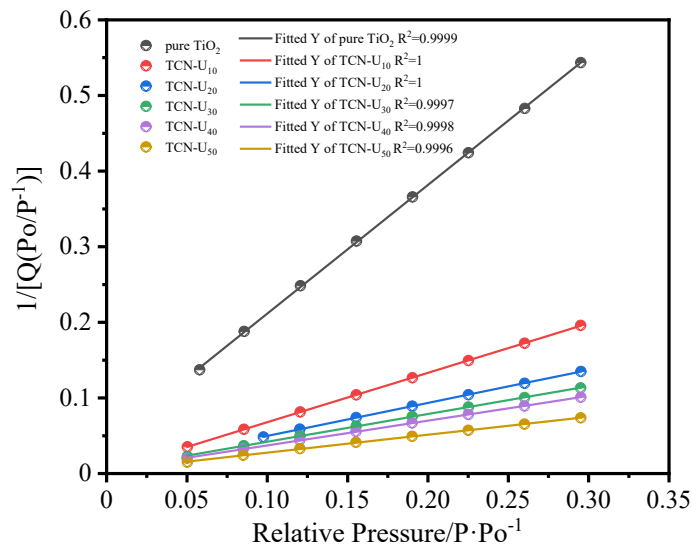

**Figure S4.** Fitted curve of BET of TCN-U<sub>x</sub>

**Table S1.** Crystalline phase ratio and cell parameters of CNT-T<sub>y</sub>, TCN-R<sub>z</sub> and TCN-H<sub>n</sub>.

| Factors                | Samples   | Anatase/wt% | Rutile/wt% | a=b/nm  | c/nm    |
|------------------------|-----------|-------------|------------|---------|---------|
| Heating Rate           | 5 °C/min  | 23.2        | 76.8       | 0.80742 | 1.74158 |
| TCN-R <sub>z</sub>     | 10 °C/min | 73.8        | 26.2       | 1.17464 | 2.51029 |
|                        | 15 °C/min | 51.4        | 48.6       | 1.22828 | 2.67937 |
|                        | 20 °C/min | 50.3        | 49.7       | 1.18717 | 2.96092 |
|                        | 25 °C/min | 51.0        | 49.0       | 0.84848 | 1.84104 |
| Temperature            | 450 °C    | 100         | 0          | 0.83034 | 1.67071 |
| TCN-T <sub>y</sub>     | 500 °C    | 100         | 0          | 0.91318 | 1.84950 |
|                        | 550 °C    | 73.8        | 26.2       | 1.17464 | 2.51029 |
|                        | 600 °C    | 25.0        | 75.0       | 0.97731 | 2.02835 |
|                        | 650 °C    | 6.0         | 94.0       | 0.97763 | 2.05398 |
|                        | 700 °C    | 0           | 100        | 0.97763 | 2.05398 |
| Heat Preservation Hour | 2 h       | 100         | 0          | 0.80751 | 7.07966 |
|                        | 3 h       | 100         | 0          | 1.07155 | 2.70974 |
| TCN-H <sub>n</sub>     | 4 h       | 81.3        | 18.7       | 1.20373 | 2.59605 |
|                        | 5 h       | 77.7        | 22.3       | 1.07155 | 2.33062 |
|                        | 6 h       | 73.8        | 26.2       | 1.17464 | 2.51029 |
|                        | 7 h       | 66.0        | 34.0       | 1.15187 | 2.24708 |

**Table S2.** Specific surface area of TCN-T<sub>y</sub>, TCN-R<sub>z</sub> and TCN-H<sub>n</sub>.

| TCN-R <sub>z</sub> | specific surface<br>area (m <sup>2</sup> ·g <sup>-1</sup> ) | TCN-T <sub>y</sub> | specific surface<br>area (m <sup>2</sup> ·g <sup>-1</sup> ) | TCN-H <sub>n</sub> | specific surface<br>area (m <sup>2</sup> ·g <sup>-1</sup> ) |
|--------------------|-------------------------------------------------------------|--------------------|-------------------------------------------------------------|--------------------|-------------------------------------------------------------|
| 5 °C/min           | 9.7                                                         | 450 °C             | 101.3                                                       | 2 h                | 85.2                                                        |
| 10 °C/min          | 19.3                                                        | 500 °C             | 62.1                                                        | 3 h                | 63.1                                                        |
| 15 °C/min          | 13.2                                                        | 550 °C             | 19.3                                                        | 4 h                | 3.8                                                         |
| 20 °C/min          | 12.1                                                        | 600 °C             | 6.0                                                         | 5 h                | 23.1                                                        |
| 25 °C/min          | 14.1                                                        | 650 °C             | 3.5                                                         | 6 h                | 19.3                                                        |
|                    |                                                             |                    |                                                             | 7 h                | 20.1                                                        |
